# Supplementary material for: Growth mechanisms and size control of FePt nanoparticles synthesized using Fe(CO)x (x < 5)-oleylamine and platinum(ii) acetylacetonate
Source: Royal Society of Chemistry journal article supplement (doi:10.1039/c3nr33602f), 2013-01-01
Supplement: c3nr33602f.pdf [file c3nr33602f.pdf]

## Supporting Information

for:

### Growth Mechanism and Size Control of FePt Nanoparticles

### Synthesized via $\text{Fe}(\text{CO})_x$ ( $x < 5$ )-Oleylamine and Platinum (II)

### Acetylacetonate

Baoru Bian,<sup>†</sup> Weixing Xia,<sup>†</sup> Juan Du,<sup>†\*</sup> Jian Zhang,<sup>†</sup> J ping Liu,<sup>‡</sup> Zhaohui Guo,<sup>§</sup>

Aru Yan,<sup>†</sup>

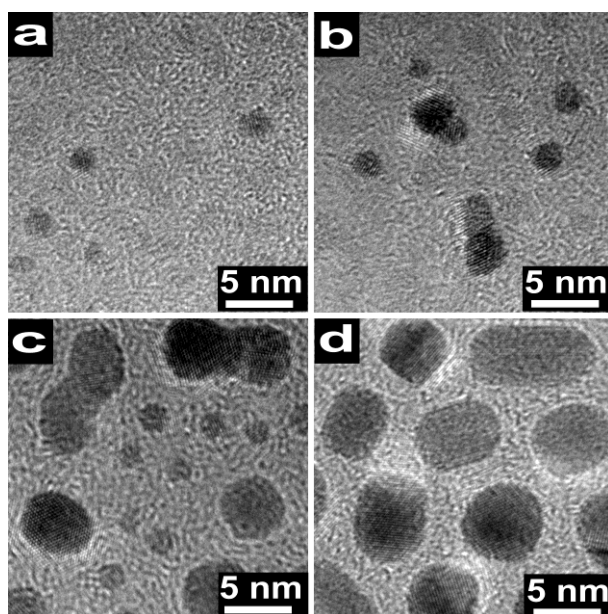

Figure S1. HRTEM images of FePt NPs synthesized from  $\text{Fe}(\text{CO})_x$ -OAm at time points during synthesis: 220 °C (a), 280 °C (b) and refluxing at 280 °C for 60 min(c) and 240 min(d), selected from Figure. 3(a), (b), (c), and (d), respectively.

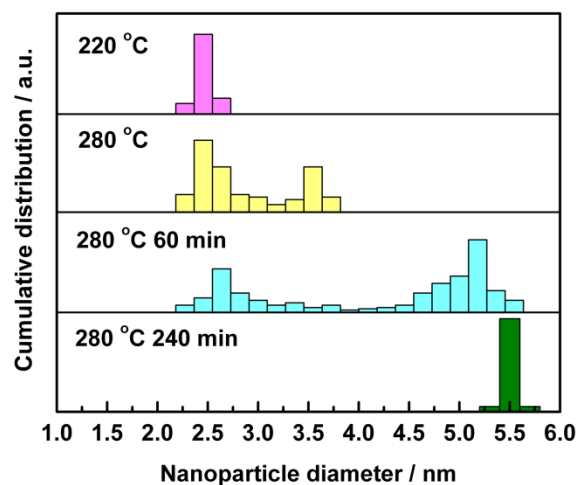

Figure S2. Size and size distributions of particles obtained at various stages using  $\text{Fe(CO)}_5\text{-OAm}$  prepared at 90 °C. (a)-(d) correspond to Figure 3 (a)-(d). (In each case, at least 400 particles were counted to determine the size and the size dispersion.)

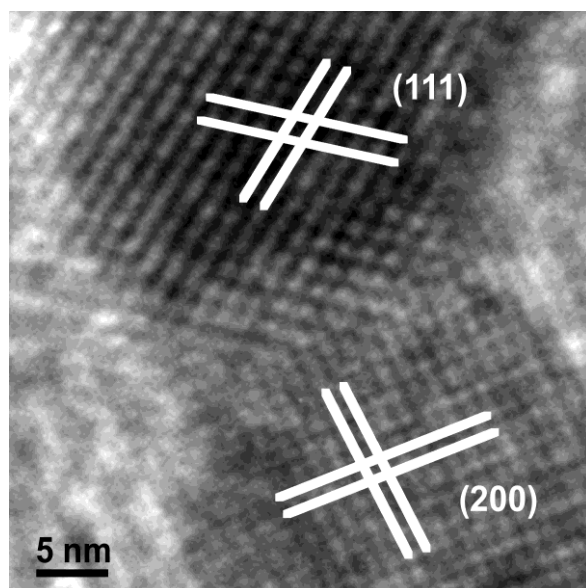

Figure S3. Enlarge HRTEM image of FePt nanoparticles shown in Figure 4c, showing a very apparent oriented-attached nanostructure

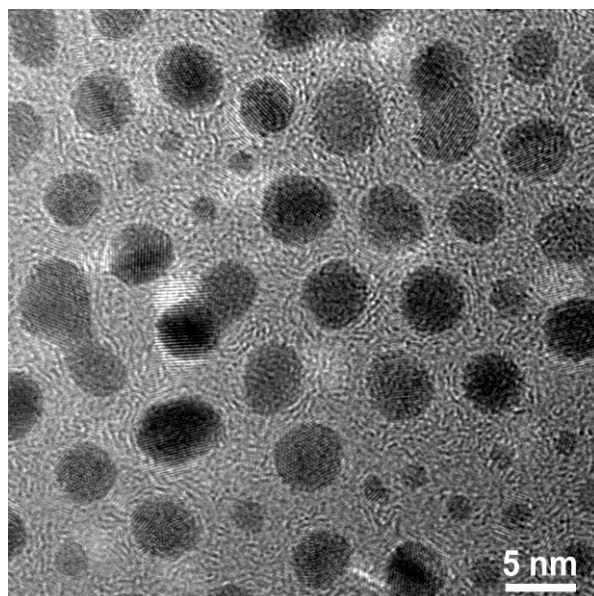

Figure S4. Photograph of FePt nanoparticles synthesized from  $\text{Fe}(\text{CO})_x\text{-OAm}$  ( prepared with  $\text{OAm}:\text{Fe}(\text{CO})_5=1:1$  at  $90\text{ }^\circ\text{C}$  ) refluxing at  $280\text{ }^\circ\text{C}$  for 60 min. These oriented-attached particles tend to be combined between two particles

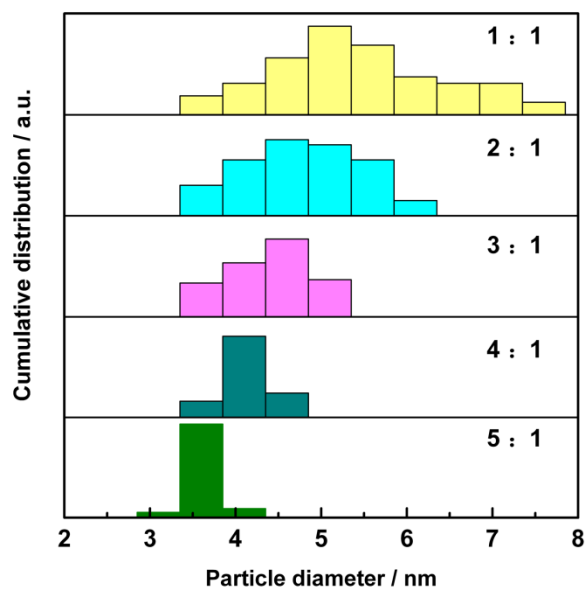

Figure S5. Size distributions of particles correspond to Figure 7 (a, b), (c, d), (e, f), (g, h) and (i, j), respectively. (In each case, at least 400 particles were counted to determine the size and the size dispersion.)
